# Supplementary material for: Temperature dependence of photoluminescence and hydrogen bonding revealed for the first time in a templated borate family: synthesis, structure and properties of a pentaborate [Emmim][B5O6(OH)4]
Source: Royal Society of Chemistry journal article supplement (doi:10.1039/c7dt03896h), 2017-01-01
Supplement: c7dt03896h1.pdf [file c7dt03896h1.pdf]

# Temperature dependence of photoluminescence, hydrogen bonding and revealed for the first time in Templated family: synthesis, structure and properties of a Pentaborate [Emmim][B<sub>5</sub>O<sub>6</sub>(OH)<sub>4</sub>]

Kang Zhou,<sup>[a]</sup> Zhuo-Qing Chen, Zhi-Qiang Liu, Jun Li, Feng-Hua Zhao,  
Chun-Yang Pan<sup>\*[a]</sup>

<sup>a</sup>*school of Chemical Engineering and Light Industry, Guangdong University of technology, Guangzhou, Guangdong 510006, China* Tel: +86-020-39322231 Fax: +86-020-39322231.

\*Corresponding author: Chun-Yang Pan, E-mail: [panchuny@gdut.edu.cn](mailto:panchuny@gdut.edu.cn)

## Sample treatment

The title compound was divided into four parts (denoted A, B, C and D) after drying treatment. The samples B, C, and D were put in the Al<sub>2</sub>O<sub>3</sub> crucible, and annealed to 100, 150 and 200°C for 1 hour, and then cooled to room temperature.

Table S1 Fractional atomic coordinates and isotropic or equivalent isotropic displacement parameters (Å<sup>2</sup>) of [Emmim]·[B<sub>5</sub>O<sub>6</sub>(OH)<sub>4</sub>](296K).

| Atoms | x          | y         | z         | Ueq        |
|-------|------------|-----------|-----------|------------|
| B1    | -0.0634(4) | 0.8834(4) | 0.1869(5) | 0.0416(11) |
| B2    | -0.0596(4) | 1.0864(4) | 0.1870(4) | 0.0423(11) |
| B3    | 0.1202(3)  | 0.9833(4) | 0.2408(4) | 0.0347(9)  |
| B4    | 0.3064(4)  | 0.9314(4) | 0.1425(4) | 0.0384(10) |
| B5    | 0.3004(4)  | 0.9330(4) | 0.3470(4) | 0.0412(11) |
| O1    | -0.1298(3) | 0.7874(3) | 0.1687(3) | 0.0560(9)  |

|     |            |            |            |            |
|-----|------------|------------|------------|------------|
| O2  | -0.1241(3) | 1.1826(3)  | 0.1697(3)  | 0.0623(10) |
| O3  | 0.3762(3)  | 0.9154(3)  | 0.0489(3)  | 0.0523(8)  |
| O4  | 0.3638(3)  | 0.9166(4)  | 0.4425(3)  | 0.0612(10) |
| O5  | -0.1142(3) | 0.9852(3)  | 0.1554(3)  | 0.0545(8)  |
| O6  | 0.0486(2)  | 1.0869(2)  | 0.2354(2)  | 0.0389(7)  |
| O7  | 0.0441(2)  | 0.8796(2)  | 0.2365(3)  | 0.0400(7)  |
| O8  | 0.1983(2)  | 0.9793(3)  | 0.1379(2)  | 0.0405(7)  |
| O9  | 0.3542(2)  | 0.8985(3)  | 0.2453(3)  | 0.0497(8)  |
| O10 | 0.1917(2)  | 0.9804(2)  | 0.3445(2)  | 0.0374(6)  |
| C1  | 0.3452(6)  | 0.3230(5)  | 0.5198(6)  | 0.0782(18) |
| C2  | 0.1363(7)  | 0.4008(6)  | 0.6453(7)  | 0.096(2)   |
| C3  | 0.1285(8)  | 0.6598(11) | 0.6513(11) | 0.166(6)   |
| C4  | 0.1250(6)  | 0.7714(4)  | 0.6469(9)  | 0.174(6)   |
| C5  | 0.2205(4)  | 0.4688(4)  | 0.5943(4)  | 0.0825(19) |
| C6  | 0.3798(4)  | 0.5400(4)  | 0.5052(4)  | 0.092(2)   |
| C7  | 0.3174(6)  | 0.6236(7)  | 0.5399(8)  | 0.098(2)   |
| N1  | 0.3084(5)  | 0.4371(5)  | 0.5465(5)  | 0.0850(16) |
| N2  | 0.2130(4)  | 0.5882(4)  | 0.6010(4)  | 0.0665(12) |

Table S2 Selected bond length (Å) and angle(°) for [Emmim]·[B<sub>5</sub>O<sub>6</sub>(OH)<sub>4</sub>](296K).

|        |          |        |          |
|--------|----------|--------|----------|
| B1—O7  | 1.353(5) | B3—O7  | 1.486(5) |
| B1—O1  | 1.366(6) | B3—O8  | 1.493(5) |
| B1—O5  | 1.369(6) | B4—O8  | 1.350(5) |
| B2—O6  | 1.353(5) | B4—O3  | 1.363(5) |
| B2—O2  | 1.354(5) | B4—O9  | 1.370(6) |
| B2—O5  | 1.383(5) | B5—O4  | 1.340(5) |
| B3—O6  | 1.456(5) | B5—O10 | 1.354(5) |
| B3—O10 | 1.457(5) | B5—O9  | 1.393(6) |

|           |          |           |          |
|-----------|----------|-----------|----------|
| O7—B1—O1  | 122.6(4) | O6—B3—O7  | 110.3(3) |
| O7—B1—O5  | 121.6(4) | O6—B3—O8  | 108.9(3) |
| O1—B1—O5  | 115.8(4) | O7—B3—O8  | 107.1(3) |
| O6—B2—O2  | 123.5(4) | O8—B4—O3  | 123.7(4) |
| O6—B2—O5  | 121.5(4) | O8—B4—O9  | 120.8(4) |
| O2—B2—O5  | 115.0(4) | O3—B4—O9  | 115.6(3) |
| O10—B3—O8 | 109.5(3) | O4—B5—O9  | 115.5(4) |
| O6—B3—O10 | 111.5(3) | O4—B5—O10 | 124.5(4) |
| O10—B3—O7 | 109.5(3) | O10—B5—O9 | 120.0(4) |

Table S3 Details of Hydrogen Bonds for [Emmim]·[B<sub>5</sub>O<sub>6</sub>(OH)<sub>4</sub>] in different temperature.

| Temperature<br>(K) | D-H                        | d(D-H)<br>(Å) | d(H···A)<br>(Å) | ∠D—H···A<br>(°) | d(D···A)<br>(Å) |
|--------------------|----------------------------|---------------|-----------------|-----------------|-----------------|
| 90                 | O1—H1···O6 <sup>i</sup>    | 0.82          | 1.927           | 169.98          | 2.739           |
|                    | O2—H2···O7 <sup>ii</sup>   | 0.82          | 1.881           | 167.66          | 2.688           |
|                    | O3—H3···O10 <sup>iii</sup> | 0.82          | 1.942           | 168.55          | 2.750           |
|                    | O4—H4···O8 <sup>iv</sup>   | 0.82          | 1.854           | 165.41          | 2.656           |
| 120                | O1—H1···O6 <sup>i</sup>    | 0.82          | 1.937           | 170.43          | 2.749           |
|                    | O2—H2···O7 <sup>ii</sup>   | 0.82          | 1.879           | 168.09          | 2.687           |
|                    | O3—H3···O10 <sup>iii</sup> | 0.82          | 1.942           | 170.10          | 2.754           |
|                    | O4—H4···O8 <sup>iv</sup>   | 0.82          | 1.869           | 165.38          | 2.670           |
| 173                | O1—H1···O6 <sup>i</sup>    | 0.82          | 1.93            | 170.9           | 2.741           |
|                    | O2—H2···O7 <sup>ii</sup>   | 0.82          | 1.89            | 168.7           | 2.694           |
|                    | O3—H3···O10 <sup>iii</sup> | 0.82          | 1.95            | 169.2           | 2.761           |
|                    | O4—H4···O8 <sup>iv</sup>   | 0.82          | 1.87            | 166.2           | 2.673           |
| 268                | O1—H1···O6 <sup>i</sup>    | 0.82          | 1.94            | 170.4           | 2.750           |
|                    | O2—H2···O7 <sup>ii</sup>   | 0.82          | 1.89            | 168.1           | 2.699           |

|     |                            |      |       |        |       |
|-----|----------------------------|------|-------|--------|-------|
|     | O3—H3···O10 <sup>iii</sup> | 0.82 | 1.97  | 168.2  | 2.775 |
|     | O4—H4···O8 <sup>iv</sup>   | 0.82 | 1.88  | 165.1  | 2.679 |
| 296 | O1—H1···O6 <sup>i</sup>    | 0.82 | 1.935 | 167.62 | 2.741 |
|     | O2—H2···O7 <sup>ii</sup>   | 0.82 | 1.884 | 167.99 | 2.692 |
|     | O3—H3···O10 <sup>iii</sup> | 0.82 | 1.983 | 175.05 | 2.801 |
|     | O4—H4···O8 <sup>iv</sup>   | 0.82 | 1.889 | 165.81 | 2.692 |
| 348 | O1—H1···O6 <sup>i</sup>    | 0.82 | 1.947 | 163.24 | 2.743 |
|     | O2—H2···O7 <sup>ii</sup>   | 0.82 | 1.901 | 165.31 | 2.702 |
|     | O3—H3···O10 <sup>iii</sup> | 0.82 | 1.989 | 171.52 | 2.803 |
|     | O4—H4···O8 <sup>iv</sup>   | 0.82 | 1.897 | 164.39 | 2.696 |

Symmetry codes: (i) -x, -0.5+y, 0.5-z; (ii) -x, 0.5+y, 0.5-z; (iii) 0.5-x, 2-y, -0.5+z; (iv) 0.5-x, 2-y, 0.5+z.

Table S4. The length of four hydrogen bond at different test temperature.

| Temperature   | 90k   | 120k  | 173k | 268k | 296k  | 348k  |
|---------------|-------|-------|------|------|-------|-------|
| O1—H1···O6/Å  | 1.927 | 1.937 | 1.93 | 1.94 | 1.935 | 1.947 |
| O2—H2···O7/Å  | 1.881 | 1.879 | 1.89 | 1.89 | 1.884 | 1.901 |
| O3—H3···O10/Å | 1.942 | 1.942 | 1.95 | 1.97 | 1.983 | 1.989 |
| O4—H4···O8/Å  | 1.854 | 1.869 | 1.87 | 1.88 | 1.889 | 1.897 |

Table S5. The changes of length about O···O at different test temperature.

| Temperature | 90k   | 120k  | 173k  | 268k  | 296k  | 348k  |
|-------------|-------|-------|-------|-------|-------|-------|
| O1···O6/Å   | 2.739 | 2.749 | 2.741 | 2.750 | 2.741 | 2.743 |
| O2···O7/Å   | 2.688 | 2.687 | 2.694 | 2.699 | 2.692 | 2.702 |
| O3···O10/Å  | 2.750 | 2.754 | 2.761 | 2.775 | 2.801 | 2.803 |
| O4···O8/Å   | 2.656 | 2.656 | 2.673 | 2.679 | 2.692 | 2.696 |

Table S6. The changes of four hydrogen bond angle at different test temperature.

| Temperature   | 90k    | 120k   | 173k  | 268k  | 296k   | 348k   |
|---------------|--------|--------|-------|-------|--------|--------|
| O1—H1···O6/°  | 169.98 | 170.43 | 170.9 | 170.4 | 167.62 | 163.24 |
| O2—H2···O7/°  | 167.66 | 168.09 | 168.7 | 168.1 | 167.99 | 165.31 |
| O3—H3···O10/° | 168.55 | 170.10 | 169.2 | 168.2 | 175.05 | 171.52 |
| O4—H4···O8/°  | 165.41 | 165.38 | 166.2 | 165.1 | 165.81 | 164.39 |

Table S7. Crystal data and structure refinement for [Emmim][B<sub>5</sub>O<sub>6</sub>(OH)<sub>4</sub>] heated at 423K for an hour under .

|                                          |                                                                              |
|------------------------------------------|------------------------------------------------------------------------------|
| Formula sum                              | C <sub>7</sub> H <sub>17</sub> B <sub>5</sub> N <sub>2</sub> O <sub>10</sub> |
| Formula weight                           | 343.25                                                                       |
| Crystal system                           | Orthorhombic                                                                 |
| Space group                              | <i>P2<sub>1</sub>2<sub>1</sub>2<sub>1</sub></i>                              |
| a (Å)                                    | 11.2905(3)                                                                   |
| b (Å)                                    | 11.5410(3)                                                                   |
| c (Å)                                    | 11.6362(4)                                                                   |
| $\alpha$ /°                              | 90.00                                                                        |
| $\beta$ /°                               | 90.00                                                                        |
| $\gamma$ /°                              | 90.00                                                                        |
| Cell volume (Å <sup>3</sup> )            | 1516.24(8)                                                                   |
| Z                                        | 4                                                                            |
| Temperaturere(K)                         | 423                                                                          |
| Measured reflections                     | 9726                                                                         |
| Independent reflections                  | 2673                                                                         |
| R <sub>int</sub>                         | 0.0227                                                                       |
| GOF on F <sup>2</sup>                    | 2.306                                                                        |
| F(000)                                   | 615                                                                          |
| Indices ranges                           | -12 ≤ h ≤ 13, -13 ≤ k ≤ 13, -11 ≤ l ≤ 13                                     |
| Final R Indices [I > 2σ(I)] <sup>a</sup> | R <sub>1</sub> =0.0854, wR <sub>2</sub> =0.2628                              |

$R$  indices (all data)<sup>b</sup>  $R_1 = 0.0905$ ,  $wR_2 = 0.2703$   
 Largest diff. Peak and hole ( $e \cdot \text{\AA}^{-3}$ ) ( $e \cdot \text{\AA}^{-3}$ ) 1.479 and -0.490  
 Refinement method full-matrix least-squares on  $F^2$

$${}^a R_1 = \frac{\sum |F_o - F_c|}{\sum F_o} \cdot {}^b wR_2 = [\sum w(F_o^2 - F_c^2)^2 / \sum w(F_o^2)^2]^{1/2}$$

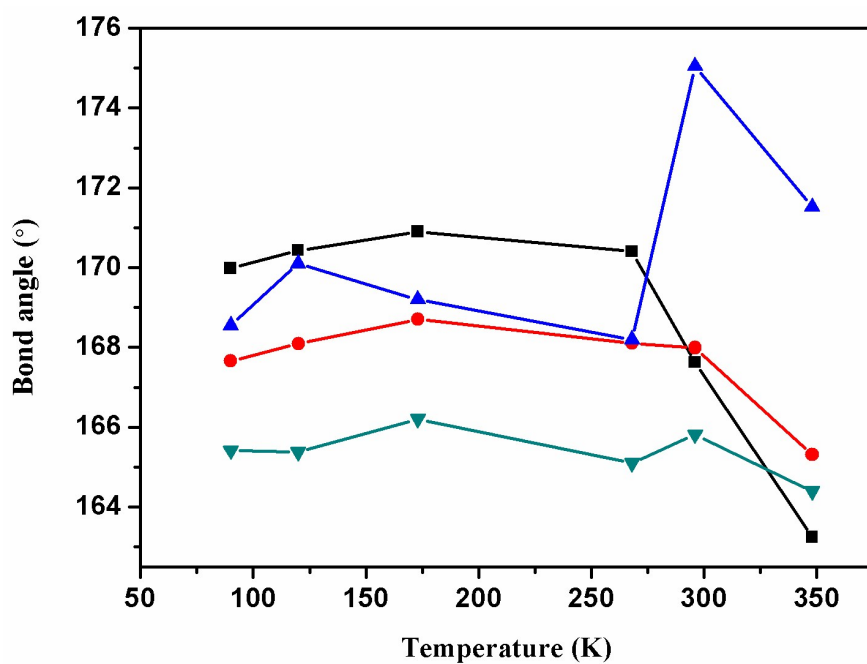

Figure S1. The change trend of four hydrogen bond angle O1—H1...O6 (black); O2—H2...O7 (red); O3—H3...O10 (blue); O4—H4...O8 (green).

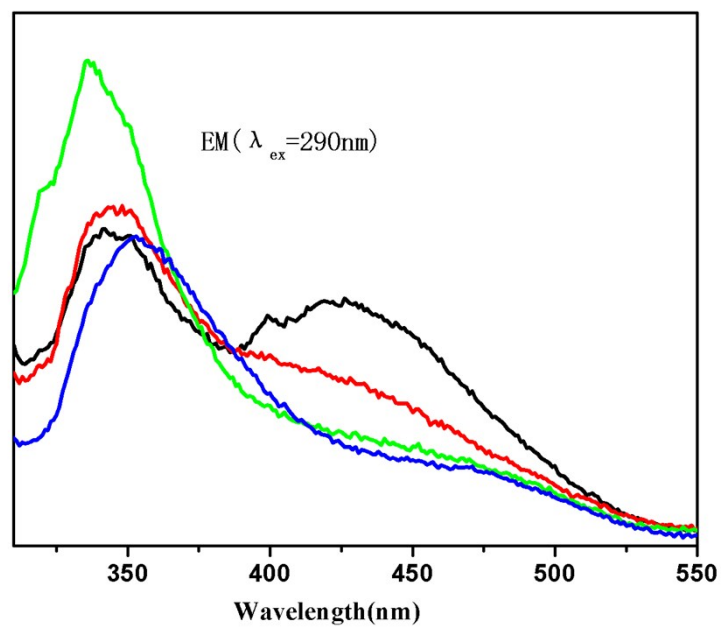

Figure S2. Emission spectra of sample A (black, no treatment), B (red, processed by 100 °C), C (green, processed by 150 °C), D (blue, processed by 200°C).
